# Supplementary material for: Tracking transcription factor complexes on DNA using total internal reflectance fluorescence protein binding microarrays
Source: PubMed Central journal article supplement — Nucleic Acids Res. 2009 May 31;37(13):e94. doi: 10.1093/nar/gkp424 (PMC2715255; doi:10.1093/nar/gkp424), 2009-05-31
Supplement: gkp424_1.pdf [file gkp424_1.pdf]

## Supplemental Table 1 for TIRF-PBM

| <u>Position</u> | <u>Sequence</u>                                      | <u>Gene</u> | <u>TBP Annotation</u> |
|-----------------|------------------------------------------------------|-------------|-----------------------|
| 1               | CTCAGGAATCCCATAAAGTAATGTGGAGCTCAGTTCAAGTCAATCGGTCC   |             | Poor                  |
| 2               | CTCAGGAATTCCTATAGAGTAATGTGGAGCTCAGTTCAAGTCAATCGGTCC  |             | Poor                  |
| 3               | TCCTGAAGGGGCACCCCTAGCTTGGTCTATCGTCGTCAGTCAATCGGTCC   |             |                       |
| 4               | GAATTCCTATGAAGTAATGTGGAGCTCCGTTCTCAAGTCAATCGGTCC     |             |                       |
| 5               | CTGCTCCGTCCGCCTTCGAGGAGAGGTCGGCATCTTCAAGTCAATCGGTCC  |             | Poor                  |
| 6               | CTCAGGAATTCCTATAAAGTAATGTGGAGCTCAGTTCAAGTCAATCGGTCC  |             | Good                  |
| 7               | CTCAGGAATTCCTATCAAGTAATGTGGAGCTCAGTTCAAGTCAATCGGTCC  |             | Poor                  |
| 8               | TCCTGAAGGGGCGCCCTAGCTTGGTCTATCGTCGTCAGTCAATCGGTCC    |             | Poor                  |
| 9               | TCTTTTCTTGCTTAAATCTATAACTACAAAAACATCAAGTCAATCGGTCC   | TPI1        | Good                  |
| 10              | CGCGCCTGCGCTCTATATATACAGCGCCCTGCCCTCAAGTCAATCGGTCC   | HIST1HIC    |                       |
| 11              | ATGTACACAGAAGCAAAGTACGAATCAGAATCAAAATCAAGTCAATCGGTCC | TAF5        | Good                  |
| 12              | CAAATGTATGCACCATATCCATTCTAAACATAGTTTCAAGTCAATCGGTCC  | UBI1        | Good                  |
| 13              | TGGATCAATCGTATAAAGAGAATTCCTGGTATGGATCAAGTCAATCGGTCC  |             | Good                  |
| 14              | TGGTATAAAGATCAATCGAGAATTCCTGGTATGGATCAAGTCAATCGGTCC  |             | Good                  |
| 15              | GCCGGCCGGCCGGCCGGCCCGGGCCCGCGCTCAATTCAATCGGTCC       |             | Poor                  |
| 16              | CTCAGGAATTCCTCTAAAGTAATGTGGAGCTCAGTTCAAGTCAATCGGTCC  |             | Poor                  |
| 17              | CTCAGGAATTCCTAGAAAAGTAATGTGGAGCTCAGTTCAAGTCAATCGGTCC |             | Good                  |
| 18              | CTGAAGGGGGGCTATAAAAGGGGATGGGGCTCCTCAAGTCAATCGGTCC    |             | Good                  |
| 19              | AAATCTTTTCTTTTCCATTCAATCAATTAATTTTCAATTCAATCGGTCC    | CLN2        |                       |
| 20              | GAATTCCTAAAAAGTAATGTGGAGCTCCGTTCTGCTCAAGTCAATCGGTCC  |             |                       |
| 21              | CTCGCTCCATCTCCAGAACTACAAGTCCCAGAGTGTCAAGTCAATCGGTCC  | HPIP        |                       |
| 22              | TTCTTGAAGGGGGCTATAAAAGGGGTTGGGGCGTCAAGTCAATCGGTCC    |             | Good                  |
| 23              | CTCAGGAATTCCTACAAAAGTAATGTGGAGCTCAGTTCAAGTCAATCGGTCC |             | Poor                  |
| 24              | TCCTGAAGGGGCACCTATAAAAGGTCCTATCGTCGTCAGTCAATCGGTCC   |             |                       |
| 25              | CTGAAGGGGGGCTATAAAAGGGGTTGGGGCTCCTCAAGTCAATCGGTCC    |             | Good                  |
| 26              | ATGACTGAATCAAGGCCGTTCTGCTAAGAAAGTCAAGTCAATCGGTCC     | CYC1        | Good                  |
| 27              | CTCAGGAATTCCTATACAGTAATGTGGAGCTCAGTTCAAGTCAATCGGTCC  |             | Good                  |
| 28              | CTCAGGAATTCGATAAAGTAATGTGGAGCTCAGTTCAAGTCAATCGGTCC   |             | Good                  |
| 29              | TCCTGAAGGGACGCCATAAAAGGTCCTATCGTCGTCAGTCAATCGGTCC    |             | Good                  |
| 30              | TCCTGAAGGGGCGACTAGCTTGGTCTATCGTCGTCAGTCAATCGGTCC     |             | Good                  |
| 31              | GAAAAACATCTAACATAAATATATAAACGAAACATCAAGTCAATCGGTCC   | HHT1        |                       |
| 32              | TGGATCAATCGAGAATTCGCGCAAGTGGTATGGATCAAGTCAATCGGTCC   |             |                       |
| 33              | GATTTAATATTAACCTTATATATGTAACCTTATTTATCAATTCAATCGGTCC |             |                       |
| 34              | CTCAGGAATTCCTATAACGTAATGTGGAGCTCAGTTCAAGTCAATCGGTCC  |             | Good                  |
| 35              | TCCTGAAGGGGCGACTATAAAAGGTCCTATCGTCGTCAGTCAATCGGTCC   |             | Poor                  |
| 36              | AGCTAAAATTTGGACAGCTCTCATTACTAAATTAATCAATTCAATCGGTCC  | GCY1        | Good                  |
| 37              | TGATTTCTCGAAGAATATACTAAAAATGAGCAGTCAATTCAATCGGTCC    | HIS3        |                       |
| 38              | GAATTCCTGTAAAGTAATGTGGAGCTCCGTTCTGCTCAAGTCAATCGGTCC  |             | Poor                  |
| 39              | ACCAGCCCATATAAATGTCACGTGCTCTAACTCTCAAGTCAATCGGTCC    | CRYGS       |                       |
| 40              | ATTCCAGTATGGCGTATAAATAAAGCGAGGAGAATCAAGTCAATCGGTCC   | SFRS3       | Poor                  |
| 41              | GTATAAAGTTCTGTAAGGGGGGCGGGTGGGGTCAAGTCAATCGGTCC      |             | Good                  |
| 42              | GATCGATCGATCGATCGATCGATCGATCGATTCAATTCAATCGGTCC      |             | Good                  |
| 43              | CTCAGGAATTCCTGTAAAGTAATGTGGAGCTCAGTTCAAGTCAATCGGTCC  |             | Poor                  |
| 44              | TCCTGAAGGAGCGCCTATAAAAGGTCCTATCGTCGTCAGTCAATCGGTCC   |             | Good                  |
| 45              | TCCTGAAGGGACGCCCTAGCTTGGTCTATCGTCGTCAGTCAATCGGTCC    |             |                       |
| 46              | CTTGAAGGGGGCTATAAAAGGGGTTGGGGCGCGTCAAGTCAATCGGTCC    |             | Good                  |
| 47              | CTCAGGAATTCCTATGAAGTAATGTGGAGCTCAGTTCAAGTCAATCGGTCC  |             | Good                  |
| 48              | CTCAGGAATTCCTATAAAGTAATGTGGAGCTCAGTTCAAGTCAATCGGTCC  |             | Poor                  |

|    |                                                      |        |      |
|----|------------------------------------------------------|--------|------|
| 49 | TCCTGAAGAGGCGCCCTAGCTTGGTCCTATCGTCGTCAAGTCAATCGGTCC  |        | Poor |
| 50 | TCCTGAAGGGGAGCCCTAGCTTGGTCCTATCGTCGTCAAGTCAATCGGTCC  |        | Good |
| 51 | TCCTGAAGGGGCGACCTAGCTTGGTCCTATCGTCGTCAAGTCAATCGGTCC  |        |      |
| 52 | CTGAAGGGGGGCTATAAAAAGTTTATGGGGCTCCTCAAGTCAATCGGTCC   |        | Good |
| 53 | TACTTCAGTTGTGAAGTGTAAACAAGTCTTATAAATCAAGTCAATCGGTCC  | UGA4   | Good |
| 54 | CCCCCGCCTACGCAAGTTTCCGGATCCGTCCATCAAGTCAATCGGTCC     |        |      |
| 55 | TCGGCTGGGAGGGAGGTGTAGCCGGTCTTTGGGGTCAAGTCAATCGGTCC   |        |      |
| 56 | GATCGATCGATCGAATCTCGATCGATCGATCGATTCAATTCAATCGGTCC   |        |      |
| 57 | GTTCTGAAGGGGGGCTATAAACGGGGTGGGGTCAAGTCAATCGGTCC      |        |      |
| 58 | TCCTGAAGGAGCGCCCTAGCTTGGTCCTATCGTCGTCAAGTCAATCGGTCC  |        |      |
| 59 | CTGAAGGGGGGCTATAAAAAGAGGTGGGGCTCCTCAAGTCAATCGGTCC    |        |      |
| 60 | CCGTAGTGCCTCGCCTCCGTTGCCGGGAAACGACTCAAGTCAATCGGTCC   | POL1   | Poor |
| 61 | AAAAACAATAAATCCTATAACCAGTTCTCCCGTCAAGTCAATCGGTCC     | MYO4   | Poor |
| 62 | TACTTGAAGTTGACAATATTATTTAAGGACCTATTTCAAGTCAATCGGTCC  | LEU2   | Poor |
| 63 | CTCAATCAATTTGTGAAGGTATAACTGTAGCCGTGTCAAGTCAATCGGTCC  | ATP16  | Good |
| 64 | ACATTTTTTCGTTTGTAGATAAATCAAGAATCTCAATTCAATCGGTCC     | ARG8   |      |
| 65 | CCCGCCCCGACTAGGACCCCTGCAGATGATCAGGTCAAGTCAATCGGTCC   |        | Poor |
| 66 | ATGATGTCCTTTTCCAAAACGCCACTCCTAGAGCTCAAGTCAATCGGTCC   | TAF2   |      |
| 67 | TGCATAAGATTTGGTCCAGTACTCGCAGGAAATGGTCAAGTCAATCGGTCC  | HO     |      |
| 68 | TGGATCAATCGAGAATCCTGGTATGGTATAAAGATCAAGTCAATCGGTCC   |        |      |
| 69 | GTTCTGAAGGGGGGCTATAAACGGGGTGGGGTCAAGTCAATCGGTCC      |        | Good |
| 70 | TCCTGAAGGGGAGCCTATAAAAAGTCTATCGTCGTCAAGTCAATCGGTCC   |        | Good |
| 71 | TCCTGAAGGGGCGCATATAAAAAGTCTATCGTCGTCAAGTCAATCGGTCC   |        | Good |
| 72 | ATGATTACTAATTTTAACTTCGAGTTCAATCTCTCAAGTCAATCGGTCC    | ACT1   | Good |
| 73 | ACAACGAGACACGAAGGTATAAAAAATAAATACATCAAGTCAATCGGTCC   |        |      |
| 74 | TATTATGGCACTTCTGTATAACTGGCTTTCATTCTCAAGTCAATCGGTCC   | PPH22  |      |
| 75 | GAATTCCTATAAAGTAATGTGGAGCTCCGTTCTCAAGTCAATCGGTCC     |        | Good |
| 76 | TTGTGCTACGGTCTCTCCACCCCTGCTGCTGTCAAGTCAATCGGTCC      | RAB30  | Good |
| 77 | GGTGAGGGTACTTATGCGGTTGTTACTTGGGTTGTCAAGTCAATCGGTCC   | KIN28  |      |
| 78 | GTTCTGAATATAAAAAGGGGGGCGGGTGGGGTCAAGTCAATCGGTCC      |        |      |
| 79 | TCCTGAAGGGGCGCCTATAAAAAGTCTATCGTCGTCAAGTCAATCGGTCC   |        |      |
| 80 | CTGAAGGGGGGCTATAAAAAGTTAGTGGGGCTCCTCAAGTCAATCGGTCC   |        |      |
| 81 | CCAACCGGACTTTGGGCTAGCGTTTAGAAAAGTCTCAAGTCAATCGGTCC   | PYK    |      |
| 82 | CGTCACTGGCGTGACCGTCCGCGCTACATACTGCGTCAAGTCAATCGGTCC  | RPL5   |      |
| 83 | GAATTCCTATATATTAATGTGGAGCTCCGTTCTCAAGTCAATCGGTCC     |        | Poor |
| 84 | GGGGGCTATAAAAAGGGGTGGGGGCGGTTCTCAAGTCAATCGGTCC       |        | Poor |
| 85 | GAAGCGAGTACGGAGGTACCAGCTGGTCTCCGTAGTCAAGTCAATCGGTCC  | ZNF513 |      |
| 86 | GTTCTGAAGGGGGGCGGGTGGGTATAAAAAGGTCAAGTCAATCGGTCC     |        | Good |
| 87 | TCCTGAAGAGGCGCCTATAAAAAGTCTATCGTCGTCAAGTCAATCGGTCC   |        |      |
| 88 | TGGCACTCGGGAGGCAGCGGCACTTTGGGGAAAGTCAAGTCAATCGGTCC   | PGK    |      |
| 89 | TAAATATTCTTTCTTATACATTAGGACCTTTGCATCAAGTCAATCGGTCC   | CYC1   |      |
| 90 | TATCACAGAAAAAAGAAAATATAATAAATTAGTATCAAGTCAATCGGTCC   | POX1   | Poor |
| 91 | CTAATATACACGGATACAAAAGAAATACACATAAATCAATTCAATCGGTCC  | ARG1   | Poor |
| 92 | TTGCCTGAAAAGAGTATAAAAAGAAATTCAGCATGATCAAGTCAATCGGTCC | AFP    |      |
| 93 | GGAAGTGACGTACGTGTCACACGTGGTCCGGCGTCAAGTCAATCGGTCC    | GNL2   | Poor |
| 94 | CCGGGTTCTGTTTCCCGCCGCGGCACTCCAGATCAAGTCAATCGGTCC     | MID1   | Poor |
| 95 | AACAAGTACAACACTCTCAATAAATTATGCGCTTCAAGTCAATCGGTCC    | POL2   | Poor |
| 96 | ATTTTTTAGTCTATATATACTCGCTCTGCCTTGTCAAGTCAATCGGTCC    |        |      |
