# Supplementary material for: Tracking transcription factor complexes on DNA using total internal reflectance fluorescence protein binding microarrays
Source: PubMed Central journal article supplement — Nucleic Acids Res. 2009 May 31;37(13):e94. doi: 10.1093/nar/gkp424 (PMC2715255; doi:10.1093/nar/gkp424), 2009-05-31
Supplement: gkp424_2.pdf [file gkp424_2.pdf]

Supplemental Table 2 for TIRF-PBM

-- indicates sequences for which data was lacking, which had extreme error ranges, or which could not be well fit.

| Sequence | TBP                                 |           |                                |           |            | TFIIA     |                                     |           |                                |           | TFIIB (only partial kinetics trial conducted) |           |                                     |           |                                | TBP:TFIIA |            |           |                                     |           | TBP:TFIIB (only partial kinetics trial conducted) |           |            |           |                                     | TBP:TFIIA:TFIIB |                                |           |            |           |      |
|----------|-------------------------------------|-----------|--------------------------------|-----------|------------|-----------|-------------------------------------|-----------|--------------------------------|-----------|-----------------------------------------------|-----------|-------------------------------------|-----------|--------------------------------|-----------|------------|-----------|-------------------------------------|-----------|---------------------------------------------------|-----------|------------|-----------|-------------------------------------|-----------------|--------------------------------|-----------|------------|-----------|------|
|          | $k_{on}$<br>( $10^5 M^{-1}s^{-1}$ ) | std error | $k_{off}$<br>( $10^4 s^{-1}$ ) | std error | $K_D$ (nM) | std error | $k_{on}$<br>( $10^5 M^{-1}s^{-1}$ ) | std error | $k_{off}$<br>( $10^4 s^{-1}$ ) | std error | $K_D$ (nM)                                    | std error | $k_{on}$<br>( $10^5 M^{-1}s^{-1}$ ) | std error | $k_{off}$<br>( $10^3 s^{-1}$ ) | std error | $K_D$ (nM) | std error | $k_{on}$<br>( $10^5 M^{-1}s^{-1}$ ) | std error | $k_{off}$<br>( $10^4 s^{-1}$ )                    | std error | $K_D$ (nM) | std error | $k_{on}$<br>( $10^5 M^{-1}s^{-1}$ ) | std error       | $k_{off}$<br>( $10^3 s^{-1}$ ) | std error | $K_D$ (nM) | std error |      |
| 1        | 0.27                                | 0.01      | 5.20                           | 0.18      | 19.40      | 1.65      | --                                  | --        | --                             | --        | --                                            | --        | 7.46                                | 0.49      | 3.76                           | 0.24      | 5.04       | 0.61      | 1.83                                | 0.35      | 6.08                                              | 0.33      | 3.32       | 0.80      | 4.85                                | 0.66            | 1.62                           | 0.09      | 3.34       | 0.62      |      |
| 2        | 2.72                                | 0.14      | 5.35                           | 0.17      | 1.97       | 0.16      | --                                  | --        | --                             | --        | --                                            | --        | 8.20                                | 0.54      | 4.23                           | 0.26      | 5.17       | 0.61      | 1.14                                | 0.46      | 5.15                                              | 0.41      | 4.50       | 2.10      | 4.59                                | 2.14            | 3.90                           | 0.47      | 8.50       | 4.90      |      |
| 3        | 1.94                                | 0.10      | 6.28                           | 0.14      | 3.24       | 0.24      | --                                  | --        | --                             | --        | --                                            | 0.52      | 0.11                                | 1.27      | 0.13                           | 2.45      | 0.77       | 7.54      | 0.50                                | 4.11      | 0.25                                              | 5.45      | 0.66       | --        | --                                  | 4.38            | 0.39                           | 1.38      | 0.05       | 3.14      | 0.38 |
| 4        | 0.41                                | 0.01      | 1.13                           | 0.06      | 2.73       | 0.17      | 1.21                                | 0.70      | 2.89                           | 0.16      | 237.70                                        | 148.50    | 8.74                                | 0.59      | 3.81                           | 0.25      | 4.36       | 0.54      | 1.00                                | 1.06      | 9.49                                              | 1.37      | 9.47       | 11.20     | 7.65                                | 0.82            | 1.72                           | 0.10      | 2.25       | 0.36      |      |
| 5        | 0.29                                | 0.01      | 3.95                           | 0.13      | 13.79      | 0.97      | --                                  | --        | --                             | --        | --                                            | --        | 7.86                                | 0.42      | 2.88                           | 0.17      | 3.66       | 0.38      | 4.55                                | 7.95      | 39.36                                             | 17.65     | 8.65       | 18.10     | 4.83                                | 0.76            | 2.05                           | 0.11      | 4.26       | 0.89      |      |
| 6        | 3.35                                | 0.08      | 5.66                           | 0.09      | 1.69       | 0.06      | --                                  | --        | --                             | --        | --                                            | --        | 6.53                                | 0.45      | 5.62                           | 0.30      | 8.62       | 1.00      | --                                  | --        | --                                                | --        | --         | --        | 6.88                                | 0.36            | 1.06                           | 0.03      | 1.55       | 0.12      |      |
| 7        | 0.55                                | 0.01      | 3.51                           | 0.10      | 6.34       | 0.30      | --                                  | --        | --                             | --        | --                                            | --        | 8.00                                | 0.59      | 5.15                           | 0.32      | 6.44       | 0.84      | 0.55                                | 0.67      | 4.52                                              | 0.57      | 8.22       | 10.90     | 7.65                                | 0.80            | 1.63                           | 0.09      | 2.13       | 0.33      |      |
| 8        | 7.49                                | 0.43      | 11.43                          | 0.44      | 1.53       | 0.14      | 3.03                                | 1.69      | 3.27                           | 0.36      | 108.00                                        | 70.50     | 8.26                                | 0.74      | 6.69                           | 0.48      | 8.10       | 1.24      | 2.05                                | 0.69      | 5.97                                              | 0.63      | 2.91       | 1.24      | 10.30                               | 1.18            | 1.76                           | 0.13      | 1.71       | 0.31      |      |
| 9        | 0.23                                | 0.01      | 7.39                           | 0.15      | 32.64      | 2.19      | --                                  | --        | --                             | --        | --                                            | --        | 5.83                                | 0.45      | 5.08                           | 0.30      | 8.71       | 1.13      | 2.02                                | 1.18      | 10.16                                             | 1.54      | 5.02       | 3.62      | 5.78                                | 0.63            | 1.71                           | 0.08      | 2.96       | 0.45      |      |
| 10       | 0.35                                | 0.01      | 5.63                           | 0.09      | 16.06      | 0.57      | --                                  | --        | --                             | --        | --                                            | --        | 6.97                                | 0.46      | 5.19                           | 0.28      | 7.44       | 0.84      | 5.74                                | 7.04      | 52.56                                             | 15.94     | 9.16       | 13.20     | 7.35                                | 0.63            | 1.28                           | 0.06      | 1.74       | 0.23      |      |
| 11       | 0.43                                | 0.01      | 5.33                           | 0.10      | 12.53      | 0.48      | --                                  | --        | --                             | --        | --                                            | --        | 7.01                                | 0.52      | 5.57                           | 0.33      | 7.95       | 1.01      | 1.65                                | 1.43      | 13.30                                             | 2.30      | 8.08       | 8.28      | 8.01                                | 0.85            | 1.53                           | 0.09      | 1.92       | 0.31      |      |
| 12       | 0.23                                | 0.01      | 4.51                           | 0.11      | 19.33      | 1.11      | --                                  | --        | --                             | --        | --                                            | --        | 9.04                                | 0.63      | 5.58                           | 0.33      | 6.17       | 0.75      | --                                  | --        | --                                                | --        | --         | --        | 18.49                               | 3.31            | 3.00                           | 0.40      | 1.62       | 0.48      |      |
| 13       | 0.98                                | 0.07      | 4.14                           | 0.10      | 4.23       | 0.40      | --                                  | --        | --                             | --        | --                                            | --        | 4.65                                | 0.28      | 5.39                           | 0.22      | 11.59      | 1.12      | --                                  | --        | --                                                | --        | --         | --        | 5.20                                | 0.43            | 0.76                           | 0.04      | 1.46       | 0.19      |      |
| 14       | 5.62                                | 0.18      | 8.47                           | 0.19      | 1.51       | 0.08      | 2.89                                | 1.86      | 3.96                           | 0.41      | 137.00                                        | 100.00    | 7.02                                | 0.65      | 6.77                           | 0.47      | 9.64       | 1.49      | 1.10                                | 0.72      | 4.04                                              | 0.58      | 3.69       | 2.87      | 8.12                                | 0.66            | 1.24                           | 0.06      | 1.52       | 0.19      |      |
| 15       | 2.67                                | 0.15      | 9.37                           | 0.21      | 3.51       | 0.27      | 1.05                                | 1.17      | 3.55                           | 0.26      | 338.30                                        | 399.30    | 6.79                                | 0.53      | 5.32                           | 0.33      | 7.84       | 1.04      | 1.59                                | 0.51      | 3.30                                              | 0.37      | 2.08       | 0.85      | 4.95                                | 0.41            | 1.42                           | 0.05      | 2.87       | 0.33      |      |
| 16       | 0.37                                | 0.01      | 3.67                           | 0.06      | 9.84       | 0.31      | --                                  | --        | --                             | --        | --                                            | --        | 7.66                                | 0.50      | 4.90                           | 0.28      | 6.40       | 0.74      | --                                  | --        | --                                                | --        | --         | --        | 6.70                                | 0.70            | 1.42                           | 0.08      | 2.11       | 0.33      |      |
| 17       | 3.20                                | 0.14      | 3.08                           | 0.14      | 0.96       | 0.08      | 2.12                                | 1.52      | 3.29                           | 0.33      | 155.00                                        | 125.00    | 8.28                                | 0.45      | 2.79                           | 0.18      | 3.37       | 0.37      | 1.26                                | 1.16      | 12.46                                             | 1.82      | 9.92       | 10.50     | 2.75                                | 0.29            | 1.32                           | 0.04      | 4.78       | 0.62      |      |
| 18       | 4.75                                | 0.10      | 3.33                           | 0.09      | 0.70       | 0.03      | --                                  | --        | --                             | --        | --                                            | --        | 8.09                                | 0.52      | 4.59                           | 0.26      | 5.68       | 0.65      | 1.97                                | 1.33      | 10.23                                             | 1.75      | 5.18       | 4.28      | 8.93                                | 1.08            | 1.71                           | 0.12      | 1.92       | 0.36      |      |
| 19       | 0.23                                | 0.01      | 3.34                           | 0.08      | 14.80      | 0.72      | --                                  | --        | --                             | --        | --                                            | --        | 0.00                                | 0.00      | 0.00                           | 0.00      | 0.00       | 0.00      | --                                  | --        | --                                                | --        | --         | --        | 6.62                                | 0.38            | 1.25                           | 0.04      | 1.89       | 0.16      |      |
| 20       | 0.27                                | 0.02      | 8.68                           | 0.23      | 31.89      | 2.66      | --                                  | --        | --                             | --        | --                                            | --        | 7.21                                | 0.58      | 4.98                           | 0.34      | 6.91       | 0.97      | 0.60                                | 0.83      | 2.25                                              | 0.57      | 3.71       | 5.77      | 4.78                                | 0.73            | 1.62                           | 0.09      | 3.38       | 0.70      |      |
| 21       | 0.80                                | 0.03      | 4.45                           | 0.18      | 5.57       | 0.40      | --                                  | --        | --                             | --        | --                                            | --        | 9.06                                | 0.64      | 4.69                           | 0.30      | 5.17       | 0.66      | 0.58                                | 0.63      | 4.80                                              | 0.55      | 8.34       | 9.86      | 9.61                                | 0.91            | 1.52                           | 0.09      | 1.59       | 0.24      |      |
| 22       | 0.58                                | 0.02      | 7.22                           | 0.20      | 12.39      | 0.75      | --                                  | --        | --                             | --        | --                                            | --        | 7.98                                | 0.65      | 5.69                           | 0.38      | 7.14       | 1.00      | 2.55                                | 0.50      | 5.80                                              | 0.44      | 2.27       | 0.60      | 8.90                                | 1.08            | 1.67                           | 0.12      | 1.87       | 0.35      |      |
| 23       | 0.16                                | 0.01      | 6.90                           | 0.14      | 42.50      | 3.45      | --                                  | --        | --                             | --        | --                                            | --        | 8.45                                | 0.53      | 5.41                           | 0.29      | 6.40       | 0.71      | --                                  | --        | --                                                | --        | --         | --        | 11.96                               | 0.99            | 1.63                           | 0.09      | 1.37       | 0.19      |      |
| 24       | 3.25                                | 0.07      | 5.88                           | 0.08      | 1.81       | 0.06      | 2.89                                | 2.52      | 2.12                           | 0.53      | 73.40                                         | 79.80     | 7.36                                | 0.42      | 4.26                           | 0.22      | 5.79       | 0.59      | --                                  | --        | --                                                | --        | --         | --        | 8.68                                | 0.81            | 1.48                           | 0.08      | 1.70       | 0.25      |      |
| 25       | 1.83                                | 0.07      | 3.52                           | 0.09      | 1.92       | 0.12      | --                                  | --        | --                             | --        | --                                            | --        | 8.81                                | 0.59      | 5.07                           | 0.30      | 5.75       | 0.69      | --                                  | --        | --                                                | --        | --         | --        | 6.75                                | 0.48            | 1.00                           | 0.04      | 1.48       | 0.16      |      |
| 26       | 0.17                                | 0.01      | 5.79                           | 0.13      | 33.58      | 2.48      | 2.35                                | 1.36      | 3.13                           | 0.30      | 134.00                                        | 88.30     | 6.92                                | 0.32      | 4.16                           | 0.17      | 6.02       | 0.50      | --                                  | --        | --                                                | --        | --         | --        | 13.05                               | 0.80            | 1.46                           | 0.07      | 1.12       | 0.12      |      |
| 27       | 5.08                                | 0.16      | 8.12                           | 0.17      | 1.60       | 0.08      | --                                  | --        | --                             | --        | --                                            | --        | 6.98                                | 0.44      | 5.63                           | 0.28      | 8.07       | 0.87      | 1.77                                | 0.22      | 4.19                                              | 0.17      | 2.36       | 0.38      | 9.44                                | 1.53            | 2.14                           | 0.20      | 2.26       | 0.56      |      |
| 28       | 0.81                                | 0.10      | 5.52                           | 0.25      | 6.82       | 1.08      | 1.04                                | 1.09      | 2.47                           | 0.24      | 238.30                                        | 270.10    | 9.40                                | 0.68      | 4.61                           | 0.31      | 4.91       | 0.65      | 2.67                                | 1.49      | 4.99                                              | 1.19      | 1.87       | 1.43      | 6.60                                | 3.86            | 5.86                           | 0.93      | 8.88       | 6.38      |      |
| 29       | 2.16                                | 0.27      | 10.66                          | 0.42      | 4.94       | 0.78      | --                                  | --        | --                             | --        | --                                            | --        | 7.25                                | 0.53      | 4.91                           | 0.30      | 6.78       | 0.87      | 6.73                                | 10.90     | 20.29                                             | 16.52     | 3.02       | 6.94      | 7.69                                | 1.87            | 3.08                           | 0.33      | 4.01       | 1.37      |      |
| 30       | 2.47                                | 0.18      | 7.41                           | 0.24      | 3.00       | 0.31      | --                                  | --        | --                             | --        | --                                            | --        | 7.62                                | 0.53      | 4.52                           | 0.28      | 5.93       | 0.73      | --                                  | --        | --                                                | --        | --         | --        | 6.07                                | 0.64            | 1.68                           | 0.08      | 2.77       | 0.41      |      |
| 31       | 0.17                                | 0.02      | 6.97                           | 0.29      | 40.81      | 6.47      | 511.38                              | 827.73    | 45.32                          | 32.54     | 8.86                                          | 16.60     | 8.14                                | 0.68      | 5.04                           | 0.36      | 6.20       | 0.92      | --                                  | --        | --                                                | --        | --         | --        | --                                  | --              | --                             | --        | --         | --        |      |
| 32       | 1.81                                | 0.17      | 5.41                           | 0.22      | 2.98       | 0.38      | 5.32                                | 0.90      | 2.45                           | 0.18      | 46.10                                         | 10.80     | 8.32                                | 0.56      | 3.68                           | 0.24      | 4.42       | 0.55      | --                                  | --        | --                                                | --        | --         | --        | --                                  | --              | --                             | --        | --         | --        |      |
| 33       | 0.25                                | 0.02      | 2.73                           | 0.26      | 10.79      | 1.90      | --                                  | --        | --                             | --        | --                                            | --        | 9.07                                | 0.50      | 2.62                           | 0.17      | 2.88       | 0.32      | --                                  | --        | --                                                | --        | --         | --        | --                                  | --              | --                             | --        | --         | --        |      |
| 34       | 2.79                                | 0.08      | 3.72                           | 0.09      | 1.33       | 0.07      | --                                  | --        | --                             | --        | --                                            | --        | 8.04                                | 0.41      | 4.33                           | 0.20      | 5.39       | 0.50      | 2.46                                | 1.32      | 8.77                                              | 1.51      | 3.57       | 2.46      | 11.34                               | 1.35            | 2.11                           | 0.16      | 1.86       | 0.35      |      |
| 35       | 5.79                                | 0.17      | 7.01                           | 0.16      | 1.21       | 0.06      | --                                  | --        | --                             | --        | --                                            | --        | 6.27                                | 0.45      | 5.77                           | 0.31      | 9.19       | 1.10      | 0.52                                | 0.74      | 5.52                                              | 0.69      | 10.60      | 16.10     | 10.36                               | 2.28            | 3.19                           | 0.37      | 3.08       | 1.00      |      |
| 36       | 5.15                                | 0.11      | 3.23                           | 0.09      | 0.63       | 0.03      | --                                  | --        | --                             | --        | --                                            | --        | 7.55                                | 0.36      | 3.71                           | 0.17      | 4.92       | 0.43      | --                                  | --        | --                                                | --        | --         | --        | 8.64                                | 0.82            | 1.78                           | 0.10      | 2.06       | 0.30      |      |
| 37       | 0.18                                | 0.01      | 2.79                           | 0.07      | 15.43      | 0.83      | --                                  | --        | --                             | --        | --                                            | --        | 7.52                                | 0.35      | 4.09                           | 0.17      | 5.44       | 0.45      | 2.57                                | 1.07      | 5.46                                              | 0.90      | 2.13       | 1.19      | 9.54                                | 0.66            | 1.61                           | 0.07      | 1.68       | 0.18      |      |
| 38       | 0.30                                | 0.02      | 8.84                           | 0.22      | 29.28      | 2.20      | --                                  | --        | --                             | --        | --                                            | --        | 6.65                                | 0.46      | 4.76                           | 0.27      | 7.17       | 0.85      | 2.71                                | 0.47      | 5.49                                              | 0.39      | 2.03       | 0.47      | 6.04                                | 1.14            | 2.26                           | 0.18      | 3.75       | 0.98      |      |
| 39       | 2.70                                | 0.12      | 5.74                           | 0.14      | 2.13       | 0.14      | 1.73                                | 1.28      | 2.83                           | 0.28      | 164.00                                        | 135.00    | 8.24                                | 0.52      | 3.71                           | 0.23      | 4.50       | 0.53      | --                                  | --        | --                                                | --        | --         | --        | 4.15                                | 0.44            | 1.25                           | 0.05      | 3.00       | 0.43      |      |
| 40       | 0.23                                | 0.00      | 1.14                           | 0.05      | 5.05       | 0.31      | --                                  | --        | --                             | --        | --                                            | --        | 8.42                                | 0.42      | 3.85                           | 0.19      | 4.57       | 0.43      | --                                  | --        | --                                                | --        | --         | --        | 14.58                               | 1.41            | 1.90                           | 0.14      | 1.30       | 0.21      |      |
| 41       | 3.90                                | 0.08      | 4.77                           | 0.09      | 1.23       | 0.05      | --                                  | --        | --                             | --        | --                                            | --        | 7.53                                | 0.44      | 4.81                           | 0.24      | 6.38       | 0.66      | 2.98                                | 0.57      | 5.27                                              | 0.46      | 1.77       | 0.47      | 7.62                                | 0.70            | 1.57                           | 0.08      | 2.06       | 0.28      |      |
| 42       | 0.14                                | 0.01      | 6.25                           | 0.17      | 45.06      | 5.04      | 2.51                                | 1.12      | 2.94                           | 0.24      | 117.00                                        | 60.50     | 7.18                                | 0.48      | 4.17                           | 0.25      | 5.81       | 0.69      | 3.16                                | 1.63      | 4.89                                              | 1.25      | 1.55       | 1.14      | 6.80                                | 0.67            | 1.77                           | 0.08      | 2.60       | 0.37      |      |
| 43       | 0.20                                | 0.01      | 6.13                           | 0.20      | 30.80      | 3.16      | 5.93                                | 0.87      | 1.49                           | 0.17      | 25.20                                         | 6.28      | 5.80                                | 0.36      | 4.57                           | 0.22      | 7.89       | 0.83      | --                                  | --        | --                                                | --        | --         | --        | 6.88                                | 0.63            | 1.67                           | 0.08      | 2.42       | 0.32      |      |
| 44       | 1.76                                | 0.14      | 6.65                           | 0.19      | 3.78       | 0.38      | 1.47                                | 1.02      | 2.90                           | 0.22      | 197.40                                        | 150.30    | 6.11                                | 0.53      | 5.48                           | 0.36      | 8.97       | 1.30      | --                                  | --        | --                                                | --        | --         | --        | 7.89                                | 0.89            | 1.87                           | 0.11      | 2.37       | 0.40      |      |
| 45       | 2.14                                | 0.13      | 9.06                           | 0.19      | 4.23       | 0.33      | --                                  | --        | --                             | --        | --                                            | --        | 9.38                                | 0.45      | 2.12                           | 0.14      | 2.26       | 0.24      | --                                  | --        | --                                                | --        | --         | --        | 6.99                                | 2.23            | 4.07                           | 0.47      | 5.83       | 2.46      |      |
| 46       | 2.77                                | 0.13      | 0.88                           | 0.13      | 0.32       | 0.06      | 1.79                                | 0.80      | 2.40                           | 0.17      | 134.00                                        |           |                                     |           |                                |           |            |           |                                     |           |                                                   |           |            |           |                                     |                 |                                |           |            |           |      |
